# Supplementary material for: Matrix colorimetry for high-resolution visual detection of free cyanide with Au@Au–Ag yolk–shell nanoparticles
Source: Royal Society of Chemistry journal article supplement (doi:10.1039/d0tc05990k), 2021-01-01
Supplement: d0tc05990k2.pdf [file d0tc05990k2.pdf]

## Supporting Information

# Matrix Colorimetry for High-resolution Visual Detection of Free Cyanide with Au@Au-Ag yolk-shell –Nanoparticles

*Cong-Ying Wen<sup>a,1</sup>, Yuzhu Chen<sup>a,1</sup>, Rong-sheng Liu<sup>a</sup>, Jiankun Huang<sup>a</sup>, Dawei Wang<sup>b,\*</sup>,  
Zejun Cao<sup>a</sup>, Benjamin Meteku<sup>a</sup>, Jingbin Zeng<sup>a,\*</sup>*

<sup>a</sup>~~College of Science and State Key Laboratory of Heavy Oil Processing~~  
~~Science and State Key Laboratory of heavy oil processing~~, China University of  
Petroleum (East China), Qingdao, 266580, China.

<sup>b</sup>Key Laboratory of Integrated Regulation and Resource Development on Shallow Lake  
of Ministry of Education, College of Environment, Hohai University, Nanjing, 2100  
98, China.

<sup>1</sup>These authors contributed equally to this work.

---

\* Corresponding author. Email: wdw@hhu.edu.cn.

\* Corresponding author. Email: xmuzjb@163.com. Fax: 0086-532-86983363.

### S.1 Preparation and characterization of different sizes of Au@ Au-Ag yolk-shell NPs

Three kinds of Au@ Au-Ag NPs, which are NP<sub>1</sub> (13-nm@3-nm@3-nm), NP<sub>2</sub> (13-nm@6-nm@2-nm), and NP<sub>3</sub> (13-nm@3-nm@4-nm), were prepared.

For the synthesis of NP<sub>1</sub> with the size of 13-nm@3-nm@3-nm, 13-nm Au cores were first prepared. Typically, 5 mL of HAuCl<sub>4</sub> (0.02428 M) were added into 100 mL of water, which were refluxed under vigorous stirring. Then, 10 mL of freshly prepared sodium citrate (0.0390 M) were quickly added into the above solution. The mixture was reacted for 15 min, and a color change from pale yellow to wine-red was observed during this process. 1.3 mL of the above Au colloid were added to 10.612 mL of deionized water containing 0.5 g PVP. Then, AA (0.25 M, 364  $\mu$ L) and AgNO<sub>3</sub> (0.01 M, 364  $\mu$ L) were separately dropped into the solution under stirring. The mixture was further stirred vigorously at room temperature for 10 min, and the color of the solution turned from red to orange, indicating the formation of Au@Ag NPs. Then, NH<sub>2</sub>OH·HCl (0.3263 M, 180  $\mu$ L) and HAuCl<sub>4</sub> (0.025 M, 180  $\mu$ L) were dropped into the mixture. Stirring was continued for another 10 min until the color of solution became blue, demonstrating the formation of Au@-Au-Ag NPs.

Another two sizes of Au@-Au-Ag NPs with different shell-to-core ratios were synthesized by adjusting the amount of AA, AgNO<sub>3</sub>, NH<sub>2</sub>OH·HCl and HAuCl<sub>4</sub>. The volume of reagents for different sizes of Au@Au-Ag NPs were listed in Table S1 below. The size characterization of NP<sub>1</sub>, NP<sub>2</sub> and NP<sub>3</sub> was shown in Figure S1.

**Table S1.** The volume of AA, AgNO<sub>3</sub>, NH<sub>2</sub>OH·HCl, and HAuCl<sub>4</sub> for three kinds of Au@Au-Ag NPs with different shell-to-core ratios.

| Size            | AA ( $\mu$ L) | AgNO <sub>3</sub><br>( $\mu$ L) | NH <sub>2</sub> OH·HCl<br>( $\mu$ L) | HAuCl <sub>4</sub><br>( $\mu$ L) |
|-----------------|---------------|---------------------------------|--------------------------------------|----------------------------------|
| 13-nm@3-nm@3-nm | 364           | 364                             | 180                                  | 180                              |
| 13-nm@6-nm@2-nm | 468           | 468                             | 180                                  | 180                              |
| 13-nm@3-nm@4-nm | 364           | 364                             | 300                                  | 300                              |

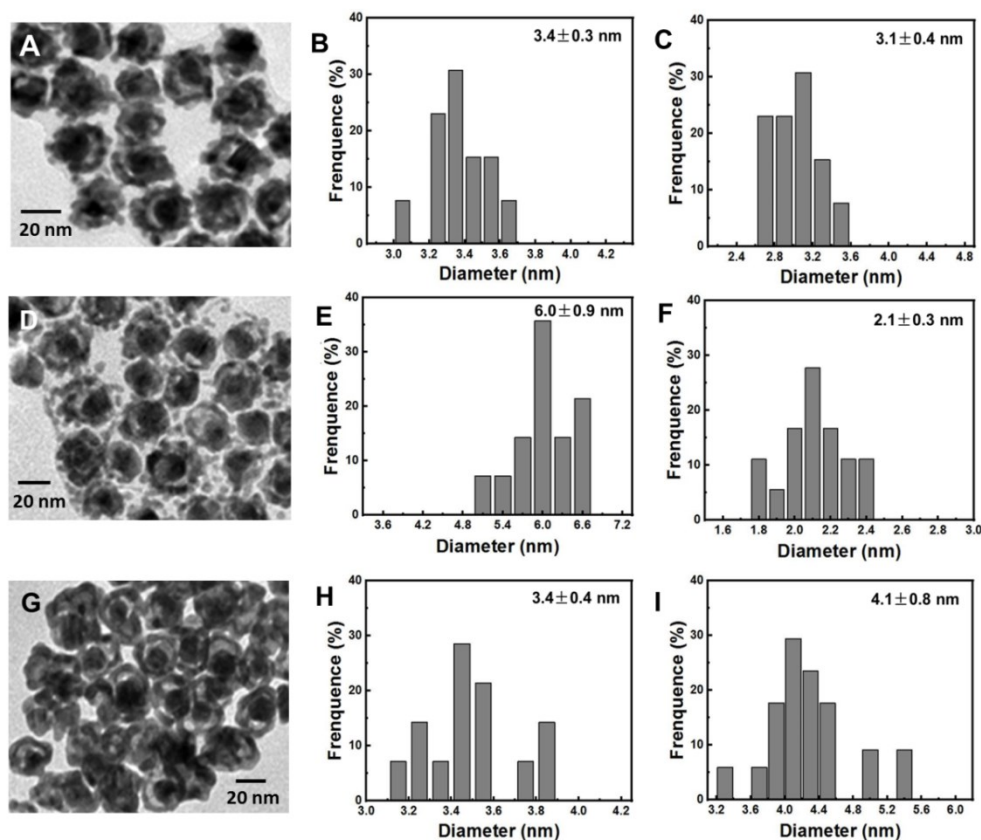

**Figure S1.** (A, D, G) TEM image of NP<sub>1</sub>, NP<sub>2</sub>, and NP<sub>3</sub>. (B, E, H) Size distribution histograms of void for NP<sub>1</sub>, NP<sub>2</sub>, and NP<sub>3</sub>. (C, F, I) Size distribution histograms of Au-Ag shells for NP<sub>1</sub>, NP<sub>2</sub>, and NP<sub>3</sub>.

## S.2 Characterization for the growth process of Au@ Au-Ag yolk-shell NPs

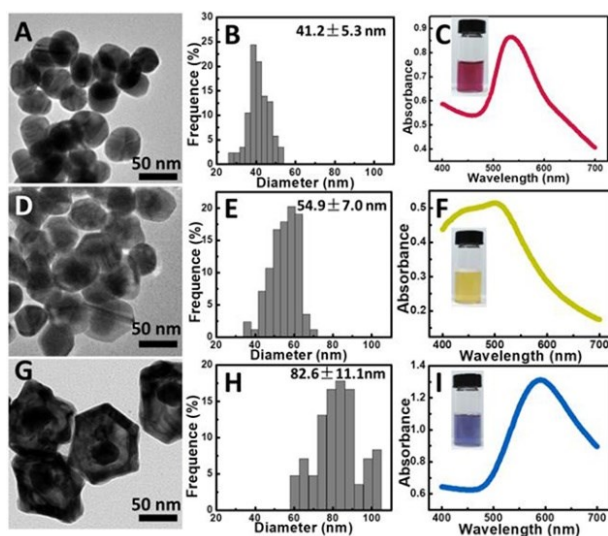

**Figure S2.** (A-C) TEM image, size distribution histogram, and UV-vis spectrum of Au NPs. (D-F) TEM image, size distribution histogram, and UV-vis spectrum of Au@Ag NPs. (G-I) TEM image,

size distribution histogram, and UV-vis spectrum of Au@Au-Ag yolk-shell NPs~~Au@Ag@Au~~ NPs. The insets in the UV-vis spectra are corresponding photographs of the NP colloids.

### S.3 ESI-TOF-MS analysis of the products of Au@Au-Ag NPs reacted with CN<sup>-</sup>

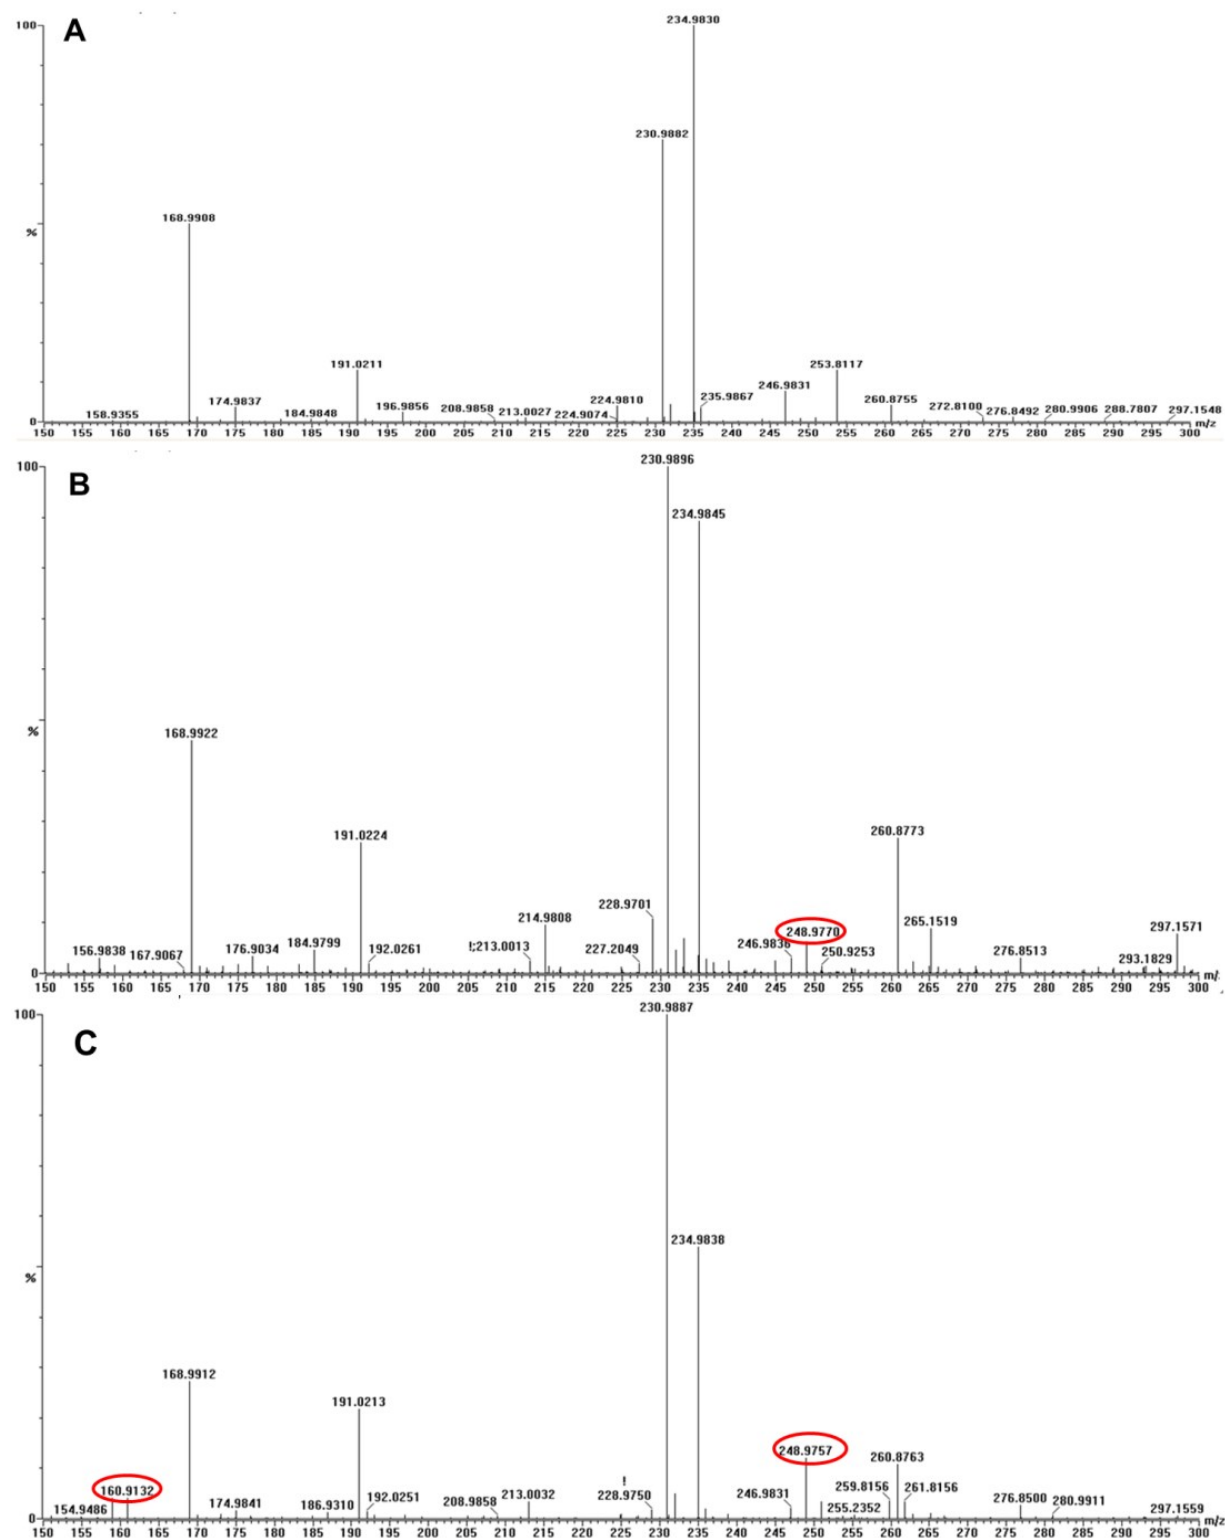

**Figure S3.** ESI-TOF-MS spectrum of the products of Au@Au-Ag NPs reacted with

CN<sup>-</sup> (A) 0  $\mu$ M, (B) 16  $\mu$ M, (C) 48  $\mu$ M.

#### S.4 UV-vis spectrum analysis of the Au@Au-Ag NPs with addition of various amounts of CN<sup>-</sup>

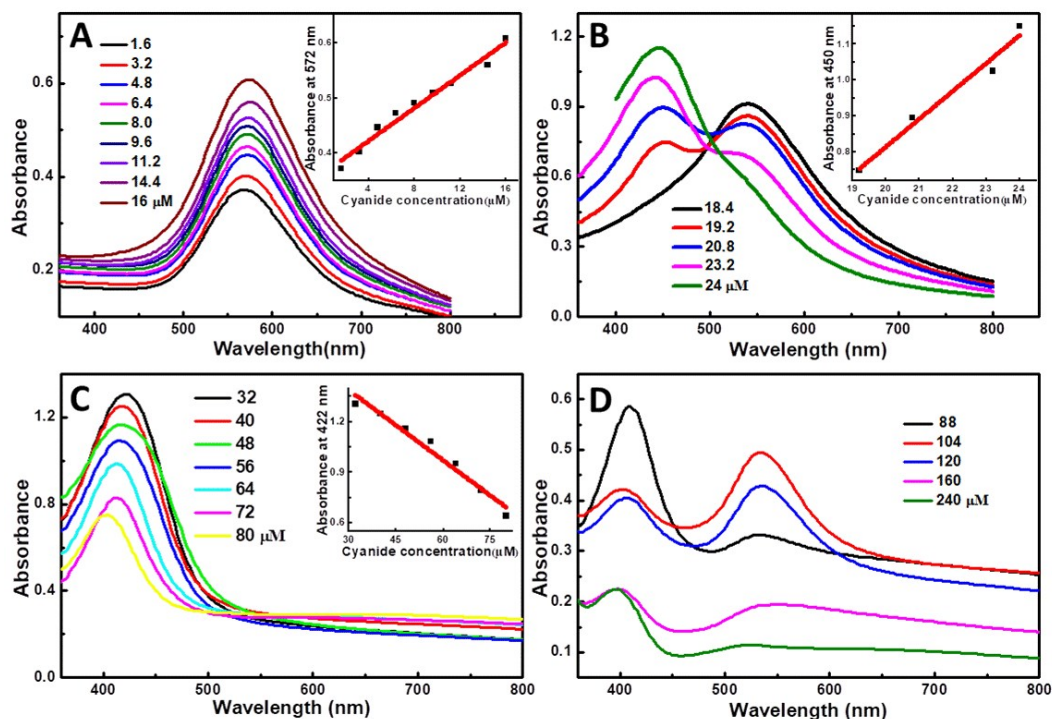

**Figure S4.** UV-vis spectra of the Au@Au-Ag NP solutions with addition of various amounts of CN<sup>-</sup>. (A) 1.6-16  $\mu$ M CN<sup>-</sup>. (B) 18.4-24  $\mu$ M CN<sup>-</sup>. (C) 32-80  $\mu$ M CN<sup>-</sup>. (D) 88-240  $\mu$ M CN<sup>-</sup>. The insets in the UV-vis spectra are corresponding linear plots.

#### S.5 Pictures of three kinds of Au@Au-Ag NP solutions after treated with different concentrations of CN<sup>-</sup>

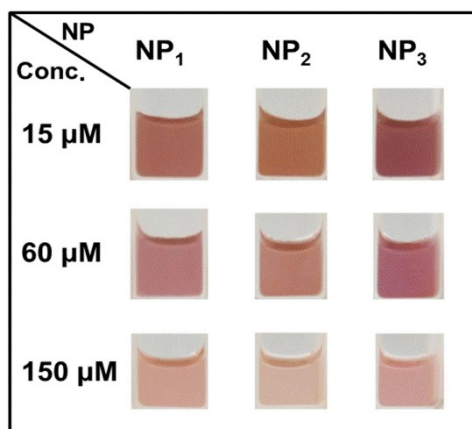

**Figure S5.** Pictures of three kinds of Au@Au-Ag NP solutions after treated with CN<sup>-</sup> of 15  $\mu$ M, 60  $\mu$ M and 150  $\mu$ M.

### S.6 Analytical results for the detection of $\text{CN}^-$ in pond water samples

**Table S2.** Analytical results for the detection of  $\text{CN}^-$  in pond water samples

| No.of the samples | Detected ( $\mu\text{M}$ ) | Added ( $\mu\text{M}$ ) | Found ( $\mu\text{M}$ ) |
|-------------------|----------------------------|-------------------------|-------------------------|
| 1                 |                            | 4                       | 4                       |
| 2                 | Not detected               | 60                      | 60                      |
| 3                 |                            | 150                     | 150                     |
